# Supplementary material for: Characterization and Functional Analysis of trehalase Related to Chitin Metabolism in Glyphodes pyloalis Walker (Lepidoptera: Pyralidae)
Source: MDPI journal article supplement (doi:10.3390/insects12040370), 2021-04-20
Supplement: s1 [file s1]

**Table S1** Sequences and relevant information used for phylogenetic analysis of the trehalase genes

| Genes name     | GenBank No.    | Species                              | Phylogenetic group |
|----------------|----------------|--------------------------------------|--------------------|
| <i>AaTre2</i>  | XP_021705796.1 | <i>Aedes aegypti</i>                 | Diptera            |
| <i>AgTre2</i>  | XP_320471.4    | <i>Anopheles gambiae</i>             | Diptera            |
| <i>AglTre1</i> | AFJ00065.1     | <i>Aphis glycines</i>                | Hemiptera          |
| <i>AmTre1</i>  | XP_393963.3    | <i>Apis mellifera</i>                | Hymenoptera        |
| <i>AmTre2</i>  | NP_001106141.1 | <i>Apis mellifera</i>                | Hymenoptera        |
| <i>DmTre2</i>  | ABH06695.1     | <i>Drosophila melanogaste</i>        | Diptera            |
| <i>BmTre1</i>  | BAA13042.1     | <i>Bombyx mori</i>                   | Lepidoptera        |
| <i>BmTre2</i>  | BAE45249.1     | <i>Bombyx mori</i>                   | Lepidoptera        |
| <i>LmTre1</i>  | ACP28173.1     | <i>Locusta migratoria manilensis</i> | Orthoptera         |
| <i>NlTre1</i>  | ACN85420.1     | <i>Nilaparvata lugens</i>            | Hemiptera          |
| <i>NlTre2</i>  | ACV20872.1     | <i>Nilaparvata lugens</i>            | Hemiptera          |
| <i>OmfTre1</i> | ABO20846.1     | <i>Omphisa fuscidentalis</i>         | Lepidoptera        |
| <i>OmfTre2</i> | ABO20845.1     | <i>Omphisa fuscidentalis</i>         | Lepidoptera        |
| <i>SeTre1</i>  | ABY86218.1     | <i>Spodoptera exigua</i>             | Lepidoptera        |
| <i>SeTre2</i>  | ABU95354.1     | <i>Spodoptera exigua</i>             | Lepidoptera        |
| <i>SfTre1</i>  | AQS60672.1     | <i>Sogatella furcifera</i>           | Homoptera          |
| <i>SfTre2</i>  | AFO54713.1     | <i>Sogatella furcifera</i>           | Homoptera          |
| <i>TcTre1</i>  | XP_973919.1    | <i>Tribolium castaneum</i>           | Coleoptera         |
| <i>TcTre2</i>  | XP_972610.2    | <i>Tribolium castaneum</i>           | Coleoptera         |
| <i>HaTre1</i>  | AJK29979.1     | <i>Helicoverpa armigera</i>          | Lepidoptera        |
| <i>HaTre2</i>  | AJK29980.1     | <i>Helicoverpa armigera</i>          | Lepidoptera        |
| <i>HvTre1</i>  | AZM68711.1     | <i>Heortia vitessoides</i>           | Lepidoptera        |
| <i>HvTre2</i>  | AYO46921.1     | <i>Heortia vitessoides</i>           | Lepidoptera        |
| <i>SlTre1</i>  | ADA63846.1     | <i>Spodoptera litura</i>             | Lepidoptera        |
| <i>SlTre2</i>  | ADA63845.1     | <i>Spodoptera litura</i>             | Lepidoptera        |
| <i>CmTre1</i>  | ALF03966.1     | <i>Cnaphalocrocis medinalis</i>      | Lepidoptera        |
| <i>CmTre2</i>  | ANC68249.1     | <i>Cnaphalocrocis medinalis</i>      | Lepidoptera        |
| <i>GpTre1</i>  | MN915101       | <i>Glyphodes pyloalis</i>            | Lepidoptera        |
| <i>GpTre2</i>  | MN915102       | <i>Glyphodes pyloalis</i>            | Lepidoptera        |
| <i>OfTre1</i>  | ANY30160.1     | <i>Ostrinia furnacalis</i>           | Lepidoptera        |
| <i>OfTre2</i>  | ANY30159.1     | <i>Ostrinia furnacalis</i>           | Lepidoptera        |

**Table S2** Primers used to synthesize dsRNA

| Primer Names    | Sequence(5'-3')                                   |
|-----------------|---------------------------------------------------|
| GpTre1-1-Olig-1 | GATCACTAATACGACTCACTATAGGGGCAAGGACTTGAACGGTATTT   |
| GpTre1-1-Olig-2 | AA ATACCGTTCAAGTCCTTGCCCCCTATAGTGAGTCGTATTAGTGATC |
| GpTre1-1-Olig-3 | AAGCAAGGACTTGAACGGTATCCCTATAGTGAGTCGTATTAGTGATC   |
| GpTre1-1-Olig-4 | GATCACTAATACGACTCACTATAGGG ATACCGTTCAAGTCCTTGCTT  |
| GpTre1-2-Olig-1 | GATCACTAATACGACTCACTATAGGGGCTCGTGTCTTGGAATATTTT   |
| GpTre1-2-Olig-2 | AAAATATTCCAAGACACGAGCCCCCTATAGTGAGTCGTATTAGTGATC  |
| GpTre1-2-Olig-3 | AAGCTCGTGTCTTGGAATATTCCCTATAGTGAGTCGTATTAGTGATC   |
| GpTre1-2-Olig-4 | GATCACTAATACGACTCACTATAGGGAATATTCCAAGACACGAGCTT   |
| GpTre2-1-Olig-1 | GATCACTAATACGACTCACTATAGGGGCAGCATGTCAAGGAGAATTT   |
| GpTre2-1-Olig-2 | AAATTCTCCTTGACATGCTGCCCCCTATAGTGAGTCGTATTAGTGATC  |
| GpTre2-1-Olig-3 | AAGCAGCATGTCAAGGAGAATCCCTATAGTGAGTCGTATTAGTGATC   |
| GpTre2-1-Olig-4 | GATCACTAATACGACTCACTATAGGGATTCTCCTTGACATGCTGCTT   |
| GpTre2-2-Olig-1 | GATCACTAATACGACTCACTATAGGGGCGTCTGGTTAGACTTCAATT   |
| GpTre2-2-Olig-2 | AATTGAAGTCTAACCAGACGCCCCCTATAGTGAGTCGTATTAGTGATC  |
| GpTre2-2-Olig-3 | AAGCGTCTGGTTAGACTTCAACCCTATAGTGAGTCGTATTAGTGATC   |
| GpTre2-2-Olig-4 | GATCACTAATACGACTCACTATAGGGTTGAAGTCTAACCAGACGCTT   |

**Table S3** Primers used in RT-qPCR

| Gene Names     | Forward Primer (5'-3') | Reverse Primer (5'-3') |
|----------------|------------------------|------------------------|
| <i>GpTre1</i>  | GAGCCTCGGAAAACATCGCA   | CAAGACACGAGCGGAATGCT   |
| <i>GpTre2</i>  | ACGGAAACACGATTTTCGGCA  | CCATCACGACGAGTAACGCC   |
| <i>GpCHSA</i>  | TACGCTTTCCACATCACCGC   | ACGGGCCTTCTCTTCCTTGT   |
| <i>GpCHSB</i>  | ACTTGGCTTTGGGCAGCTTT   | GGTCCCTCGTCAACGCATTT   |
| <i>GpCDA1</i>  | TTCAAGCCATTCGCTGTCCC   | CCAGGAAGCCATCTTGGCAG   |
| <i>GpCDA5</i>  | GTGCTTCCCTCCTAACACGC   | CCCTTTCGATGGCAGGGTTC   |
| <i>GpCDA2</i>  | TTGGTGTGCGTGCTCCTTAC   | TATGGGCGTTACCGTTGCAC   |
| <i>GpCHT-h</i> | GCGACCCCTACAGAGGCAAC   | TTTTCGCTTCACCGCATCGT   |
| <i>GpCHT3a</i> | TTCAACGACTACAGCCCCGA   | GAGAAGTAGCCGTTCAAGGCG  |
| <i>GpCHT3b</i> | TCGGGGAGAAGGTCGAGAGA   | ATTCCAGGGCCAGTCGCAT    |
| <i>GpUAP</i>   | ACAACGTCGGTTTACCCTCC   | CAGTTGGAGCCATTGTGTGC   |
| <i>GpPAGM</i>  | ATCAAGCAGGTGAACGCAGA   | CGTGGTGACGATACCGAACT   |
| <i>GpCDA4</i>  | GCCCTATACCAACAACGCCC   | AGAAAGTCCCGCGTATGGGA   |
| <i>GpCHT7</i>  | GGAGGAGTCTGTGGTGGGAA   | ACGCTACTGAGGCCCAATCT   |
| <i>GpRpl32</i> | CGATCACCTTCCGCTTCT     | TGCTACCCAATGGCTTCC     |

1 ATGATGTTTCAACTCTGGTAGTAGCGGTGGCTGCCGACGCTGTGGTCGGTGATGACCTTCCACCGTCATCGCGTTAA  
7 M M F Q G C L L V V A V A A A A V V G T D D L P F S C G K  
19 CAGGCTACTGCGACAGCGAGCTGTGCACTTTGTGCAGATGGCAGCGCTACCTGACCTCCAAAGTCCTTCGTCGAC  
27 P V Y C D S D L L H F V Q M A R L Y P D S K S F V D  
157 ATGCACATCGGTCGAGACCCCGAAGAATTTCTCGAAGACTTCGATCAACTTCTCAACAGCTCGCAAAGGAATCCACC  
53 M H C M R R D P E E I L D F D Q L L N S S Q R N P T  
235 AGAGAAACAATCCAGGCTCTCGTTAACGAAACCTTTAACGAGGAAGTCGAAATGAAACCTGGTTACCATCTGATTAC  
79 R E Q I Q A F V N N E N F E E V E I E N W L P S D Y  
313 ACGGAGAACCCCAATCTCCTTTGGGAATTCGGCAGGAAACCTTCGGCAATATGGCAAGGACTGAACGGTATTTGG  
405 T E N P K F L L G I R D E K L R Q Y G K D L N G I W  
391 CCAAACTCTGGGAGGAAAGTCAAGGCATCCGTTCTAGAGAATCCTGATCGGTACAGTCTCATCCCAATCCCAATGGG  
131 P N L G R K V K A C S V L E N C P D R Y S L I P I P N G  
469 TTCATAGTCCTCGGAGCGAGTTTAGAGAAATATACTACTGGGACAGCTACTGGATAATCGAAGTTTGTCTACAGT  
157 F I V P G G R F R E I Y W D T Y W I I E G L L I S  
547 GGAATGCCAGACAGCTAAGGCTAGTTGACAAATTAATCAACTATTAAAAAATTAGCGCATGTGCCAACCGG  
183 G M P E T A A K G M I D N L I Q L L K K L G H V P N N G  
625 AGCAGATACTATTACCGAGGACGAAGCGCCGCTTTGCTAACCGCTATGGTATCCCTTTATATCCGCGAACTGGC  
209 S R Y Y Y Q E R S Q P P L L T A M V S L Y I R E T G  
703 GATACTAAGTTTTTGAAGATAACATCGAGGCGCTGGAAGACAGTTACGTTACTGGCTTGACACTCAAATTGTTACT  
235 D T K T K L D N I E A L E D E L R Y W L D T Q I V T  
781 TTCGATAAAGGTGAGGAACTACACCCCTTTTAAGTACTACTTCCAAGTAAGACCTCGTCCGAGCTCTTACTAC  
261 F D K E G E T H T L T L R Y V S P S K G P R P E S Y V  
559 GAAGACTACAGTGGCGCAAAATTTCCAATTATAGCAGACAGACGGGAATATTACATTGACTTAAAAAGTGGCGCT  
287 E D Y S S G A Q N F Q S N D R Q T E Y Y I D L K S A A  
937 GAGATGGATGGGACTTTTCCAGCGCTTGGTTCATGAGCGCTGATGGAAATAACTCCGGTAACCTTTCCAGGATTAC  
313 E S G W D F S T R W F M D A D G N N S G N L S T I H  
1015 ACTAAGACATAGTGCGCTGTGGATTGAATGCTATTTTGGCAATGCTCTTCAAACAGTGGCCATTTCGAGAGGCCCT  
339 T K D I V P V D L N A I F A N A L Q N M A Y F E G L  
1093 TTGAAAAACCGCGTAGGCGCTCTCACTGGGCGCTATCTCGCTAAACAATGGAGACCATATCCCAAGAGGTTATTTGG  
365 L K N T R R A S H W A Y L A K Q W R S T I Q E V F W  
1171 GACGAGACGACGGCATATGGTACAGTATAGCTGAGCGCTCGGAAACACTCGCAAACTACTTCTACCAAGCAATGTG  
391 D E D D G I W Y D Y S L S L G K H R K Y F Y P S N V  
1249 GCTCCTCTTTGGATGGGAGCGGTGCAGAACAGATTAGTGAAGAAGCATTCGCTCGTCTTGGAAATTTGGCGAA  
417 A P L W M G A V D K R L V K K H S A R V L E Y Y L A K  
1327 TCGCAGCGGACTGGACTTCTTGGTGGTGTTCGCGTGTCTTTGATCAACGAGGGGAGCAATGGGACTTCGGTATGCA  
443 S H L D F P G G G V P V S L I N S G E Q W D F P Y A  
1405 TGGCCACCTCTAGTAAGTGTGTTGTGAATGCATTGGAGGCTTTAGATACTGAAGAGGGGAAGAAAGTGGCCTTCAGG  
469 W P P L V S V V N A L E A L D T E G K K A V A F R  
1483 GTTCTGAGACATGGGTGAGGGCATGCACAAGGTTTCCCTTGAAGATAGCAGATGTTTGAAGAAATGATGATGTCGAA  
495 V A E T T W R A C H K G F L E S K Q M F E K Y D V E  
1561 GTCCAGGCGAATTGGCGGTGTGGCGCAATTACTGTATACAGACGGCTTCGGTGGGCAACGGAGTGGTCTTGAA  
521 V P G R G F G G G G G E Y Y V Q T G F G W A N G V V L E  
1639 TTCTTAACAAGTACGGTAGGACGCTAACGGCAGAAGTATCACGAGGATGAGGGGCTCTTCATTA  
547 F L T K Y G R T L T A A E D S P S D E G S S \*

1 ATGATCTGGGAATATTATTAGGTTTCTCTTGCTGGTGCTGCGCTGCGGCAGACGGGAGCTATCTACCTCCCTACTGTTT

79 M M W N I L L G F L L V V A V A A D R S Y L E P T C F

27 AGTGAGATCTACTGCCATGGCCCATTTGCTGGACACCGTGCARAATTGGCGGGCCCTCTACAACGACTCCAAGACCTTCGTC

157 S E I Y C H G P L L D L T V Q M A G L Y N D S K T F V

53 GACATGAAGCTGAGGAATCTTCCTCCGTGACCATGGACCACTTCATCGAAATGATGACAGAGATGGCTCCGACGC

235 D M K L R N L P S V T M D D H F I E M M N R T R S Q P

79 TCGAAACGGGAGATCTTGCACTTTGCTCGAGAATTTTGAAGCAGAGGCGCTGAGTTTGAAACTGGGTGCCTGAA

313 S K A E I L Q F V L E N F E A G E A F E N W V P E

105 GACTGGGAAGCTGACCTCAATCTCCTTAAAGGAATAAAGGACCCCTTGCTGTCATGAGTGGGCTCCCGCTTGAAACA

391 D W K S D P Q F L L K G I K D P L L H E W A S R L N K

131 CTGGCTGTGCTCGGCGGAAGATGAAGCAGCATGTCAAGGAGAATCTTCGACCTCTACTCATCTCATCTGAGTGGAC

469 L W L V L I G G R K M K Q H V K E N F D L Y S I Y V D

157 AACCTTCATCATGCTTCAGGTGGCGGTTTCAGAGATTTCTACTACTGGGACTCATACTGGATCATCAAGGGCTCTCTA

547 N P I I V P G G R F R E F E Y Y W D S Y W I I K G L L

183 CTGTGGAGATGCGGCAGACTGCGAGGGGGATGGTCTCCAACTTATGGACGTGTGAAAGGATGGGCTTCATCCCC

625 L S E M R Q T A R G M V S N L M D V V E R M G F I P

209 AACGGTGGGAAGATATACGCCATAGAGTCCCAACCCCACTACTGATTCCTCATGAGTCAAGTCACTGATGGAGGAT

703 N G G R I Y Y A M R S Q P P L L I P M M K L L M D D

235 GGTGATCGGAGAGTTCCTCAAGTCACGGATGCACACCTGGACAGAGGATTCGACCTTCTGGGTCAACACCAACC

781 G E S E E F L L K S R I D T L K E F D F W V N N H T

261 ATAGACGTGGAGACTGAGGCGAAGATATACAAATTGGCTCGGTTTATTGACCAATCGCGGGGCGCGGGCGGAGAGC

859 I D V E H E G K I Y A K L R A F I D Q S R G R P E S

287 TATAAAGAGGATGTAGACATCGCCAAAACCTTTGACACGCAAGACAAGAAGGAGGAATTTGACCTGAGCTGAAGTCC

937 Y K E D V D I A K N F D T Q D K K E E L V I A E L K S

313 GCGGCTGAGTCAGGATGGGACTTTTCTCTAGATGGTTTATCATACCGGAAGCAATTAAGACAAATCTTATCTACAA

1015 A A E S G A W D F S S R W F I L N G T N K D N P Y L Q

339 TTGACACTTAAAGTAGCTGTCTACAAATTGACTGGGCGAGGAACCAATCGTGGTAATTTGACCAACCTCAAGACCCGT

1093 L A L K D K L L O M T G Q E P I I G N L T N L K T R

365 TCGATCGTGCCACTGACTTGAATGCAATGATGTGCGGCAACCGGAGGCTGATGAGGCAATTTTCATGCGGAAGTGAAC

1171 S I V P V D L A N A M M C G N A K L M S E F H A K A L N

391 AACCACTTGAAGCGGATTACTATAGGAAAATGCACGCAGACTATAAGGAGGCTGTGGAGAAGGTATTATGSCACGAG

1249 N Q L K A D Y Y R K M H A D Y K E A V E A V L W H E

417 GAGCTCGCGCTTGTGTAGACTTCAACCTGGAGTCAGGCGGGCGGAGACTACTTCTACCGCTCGAACATCAACCCCT

1327 D V G V G L D F N L E S G R R R D Y F Y P S N I N P

443 CTCTGGACTAACTCTAGCATAGTCCAGGAAGAAGTACTACGTCAACAGGTCATCAATTACTTGGATAGGTCAAG

1405 L W T N C Y D Q S R K E Y Y V N K V I N Y L D K V K

469 GTGGACATCTTTGAAGGTGGCGTCCCAACACCGTTTGAACATCGGCGGAACAGTGGGACTCCCCAACCGCTGGCOA

1483 V D I F E G G V P N T F E H T G E Q W D Y P N A W P

495 CCAACCATGCATATTATCATGAGGCTCGCCGACATGGGCTCGCGAGGCTGAAGATACGCCAAGAATATAGCC

1561 P T M H I F I M S L A D T G V P E A E R Y A K E I A

521 ACGAAGTGGGTCCGGTCCAACCTTCGAGGTCGGAAGCAGAAGGACGCTATGTTGGAAGAAAGTATGATGCTACTAGATT

1639 T K W V R S N F E V W K Q K D A M L E K Y D A T R F

547 GCGGGTTCGCGGGTGGCGGAGAGTACGTGCTGCAAACTGGTTTCGGTTGGACGAACTGGGTTATATTGGCCCTTTTG

1717 G G F G G G G E Y V V Q T G F G W T N G V I M A C G L

573 GACAATAACGGAACAGATTTCGGCAGCGGACGCTTCGCTACTGCGCTGCTGACTCTGGTGGGTTGACGGAGCC

1795 D K Y Y N C T I S A A D A F G T A P A D S G A V Y G A

599 CAGTGGGCGCTGGAGGGGTGGCCACGGCGTTACTGTCGTGATGGCTTCGGTTCAGCTGGAGCGTATAGGCTGA

609 H V G A G G V A T A L L V M A S V A A G A L G \*

**Figure S1. Characteristic analysis of GpTre1 and GpTre2 sequence.** (A) and (B) are GpTre1 and GpTre2 nucleotide and deduced amino acid sequences, respectively.

Underlines are potential N-glycosylation sites predicted by PROSCAN. The gray background is the amino acid sequence of the putative catalytic domain. The red letters are signature sequences that might be involved in catalytic function. Double-underlines are signal peptide. The boxes are highly conserved glycine-rich regions. The blue letters are the putative transmembrane region predicted by TMHMM Server v. 2.0.
